# Supplementary material
Source: Springer Nature journal article supplement (https://www.springermedizin.de/resource/supplementary/13020_2010_91_MOESM3_ESM.pdf/9640958)

**A**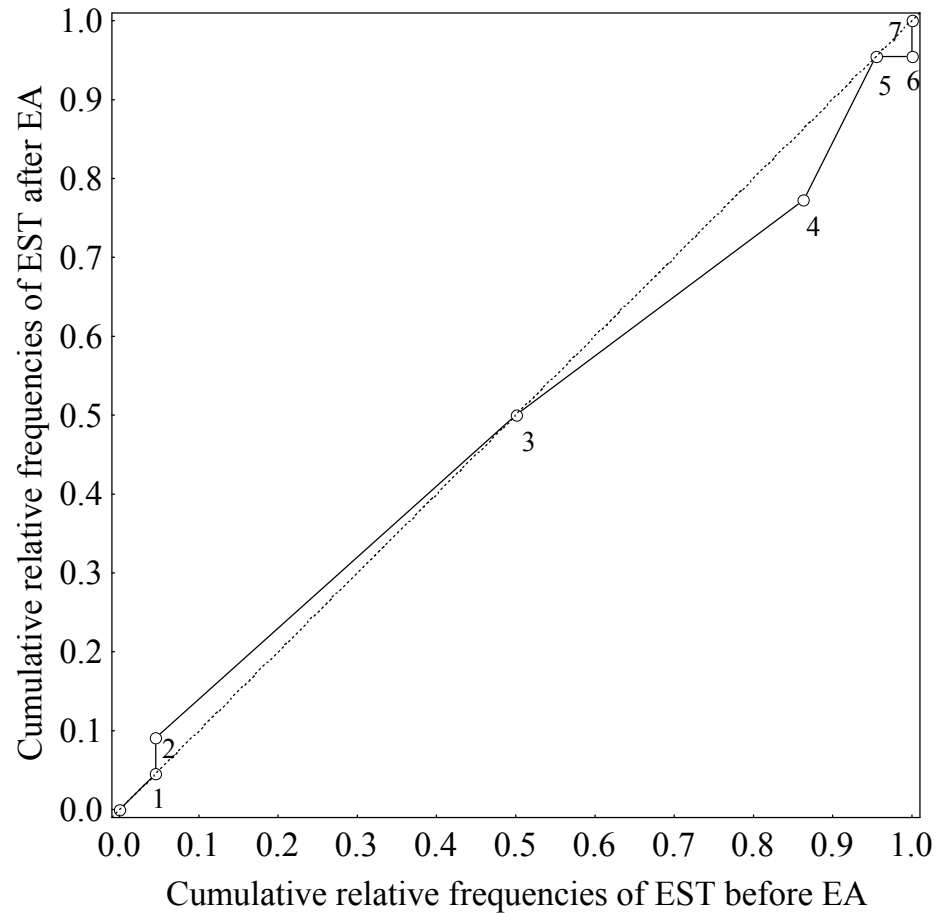**B**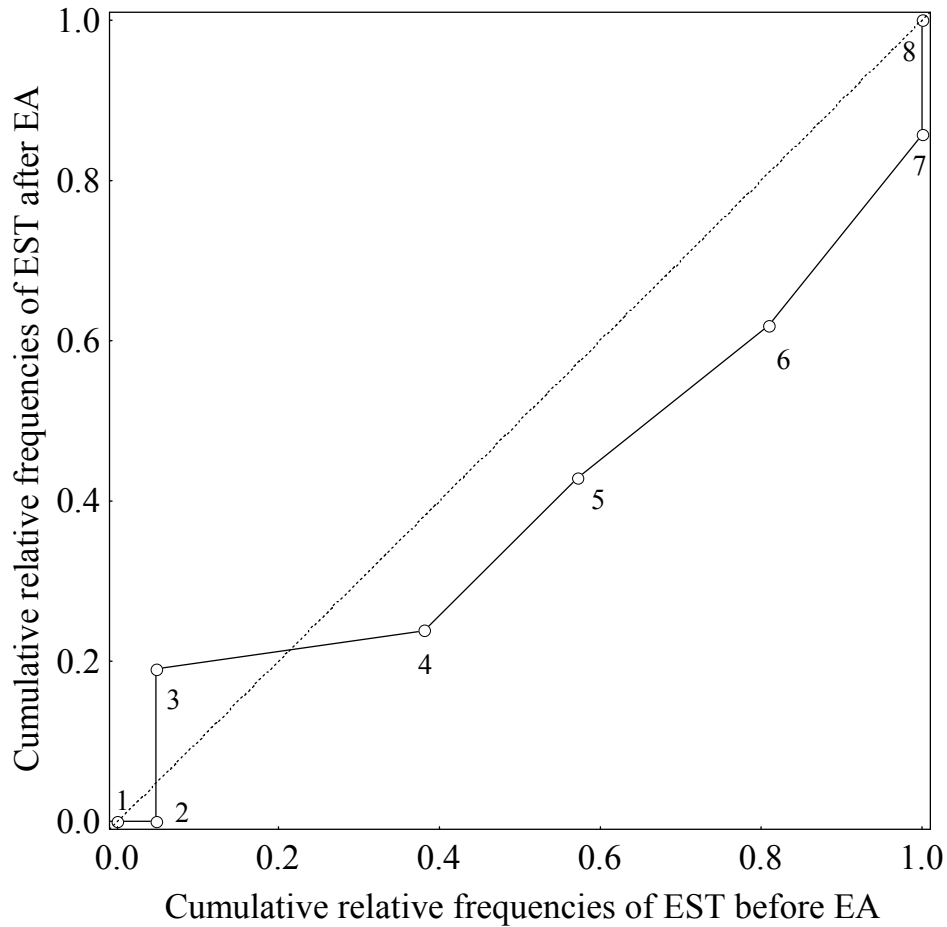

Supplement: MOESM3 [file 9640958]
